# Supplementary material for: Synthesis of a Superhydrophobic Polyvinyl Alcohol Sponge Using Water as the Only Solvent for Continuous Oil-Water Separation
Source: Hindawi journal article supplement (doi:10.1155/2019/7153109), 2019-10-20
Supplement: f1 [file 7153109.f1.pdf]

# Synthesis of a superhydrophobic polyvinyl alcohol sponge using water as the only solvent for continuous oil-water separation

Junyong Chen, Junhui Xiang\*, Xian Yue, Huaxin Li, Xianbo Yu

Center of Materials Science and Optoelectronic Engineering, College of Materials Science and Optoelectronic Technology, University of the Chinese Academy of Sciences, Beijing 100048, China.

\* Corresponding author. Tel: 86-10-6967-1772.

E-mail address: xiangjh@ucas.edu.cn.

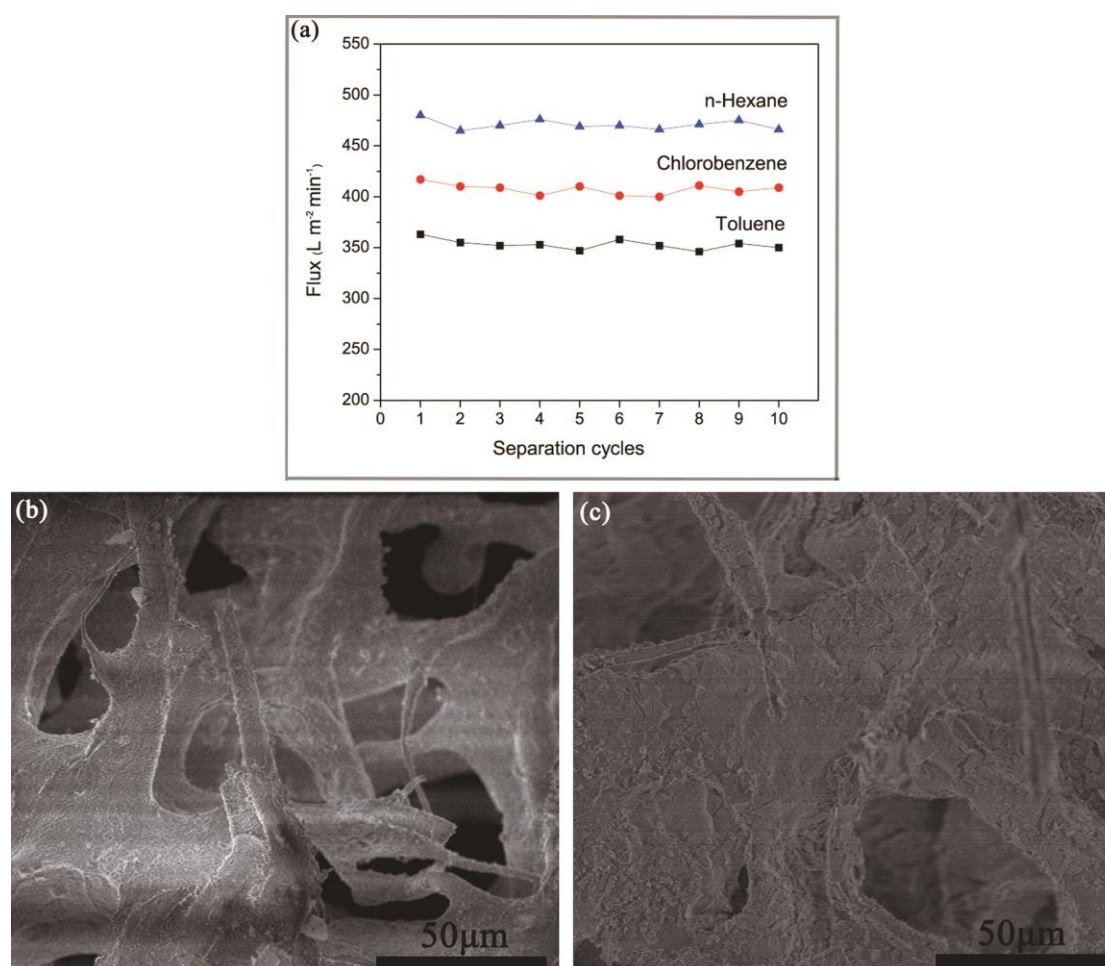

**Fig. S1.** (a) Separation cycles of oil-water mixture. (b) SEM image of the silylated PVA sponge before toluene-water separation. (c) SEM image of the silylated PVA sponge after 10 separation cycles of toluene-water.

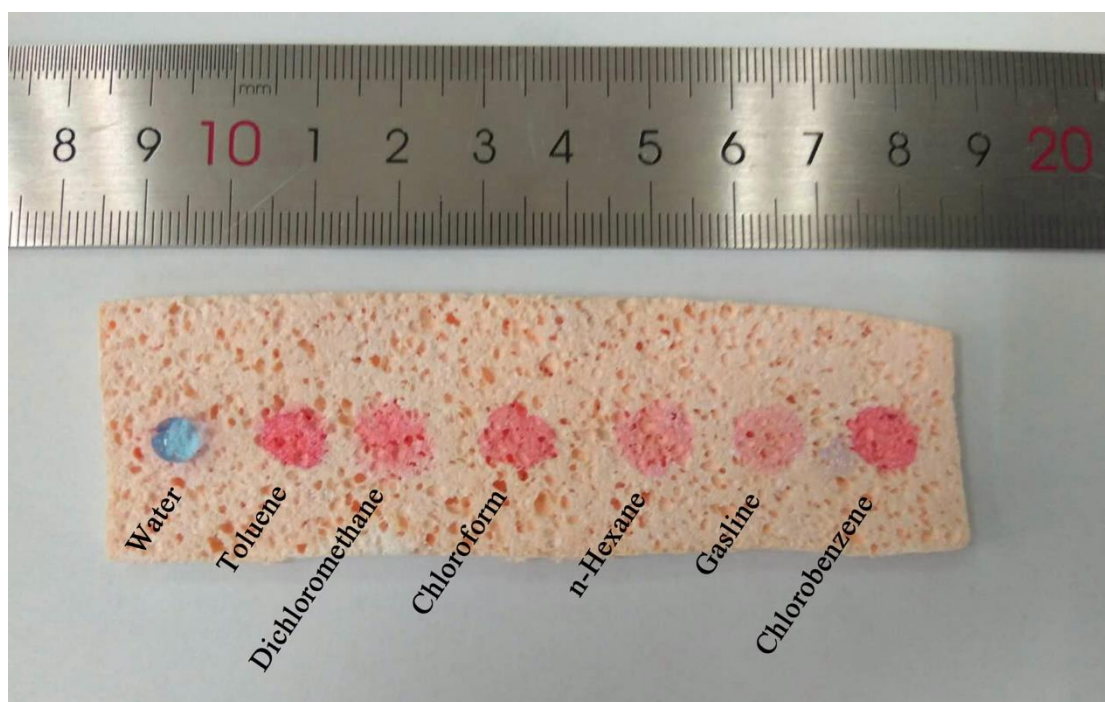

**Fig. S2.** Photograph of water (colored blue) and kinds of hydrophobic solvents (colored red) dropped onto the surface of the silylated PVA sponge. Hydrophobic solvents are colored red with Sudan III and water is colored blue with Methyl blue in advance, respectively.

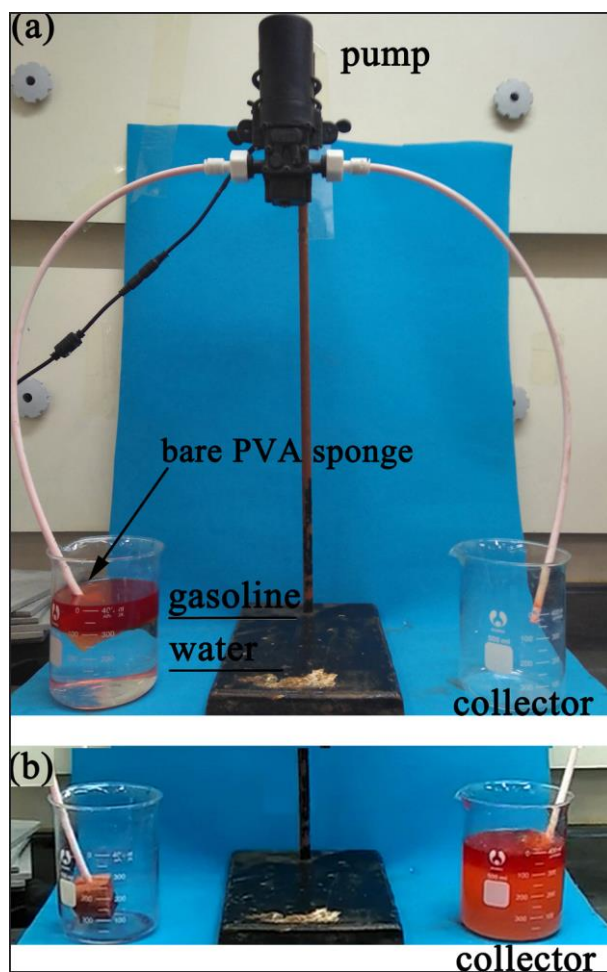

**Fig. S3.** Photographs of (a) the continuous oil-water separation device, (b) oil-water mixture image after continuous adsorption. Gasoline is colored red with Sudan III in advance.
